# Supplementary material
Source: PubMed Central journal article supplement (PMC3193113)
Supplement: supp_101508_change-liu-1-at.pdf [file supp_101508_change-liu-1-at.pdf]

**Appendix 1. Original source guideline, type of recommendation, level and grade of evidence, and corresponding references (as supplied by the authors)**

| Source Guideline | Type:                   | Recommendation                                                                                                                                                                                                                                                                                                                                                                                                                                                                                                                                                                                                                                                                                                                                                                                                                                                                               | References |
|------------------|-------------------------|----------------------------------------------------------------------------------------------------------------------------------------------------------------------------------------------------------------------------------------------------------------------------------------------------------------------------------------------------------------------------------------------------------------------------------------------------------------------------------------------------------------------------------------------------------------------------------------------------------------------------------------------------------------------------------------------------------------------------------------------------------------------------------------------------------------------------------------------------------------------------------------------|------------|
| Obesity Canada   | Body habitus            | Height, weight and waist circumference should be measured and body mass index calculated for all adults. (Grade A, Level 3)                                                                                                                                                                                                                                                                                                                                                                                                                                                                                                                                                                                                                                                                                                                                                                  | 1–4        |
| Obesity Canada   | Body habitus            | History and a general physical examination to exclude secondary (endocrine or syndrome-related) causes of obesity and obesity-related health risks and complications. (Grade A, Level 3)                                                                                                                                                                                                                                                                                                                                                                                                                                                                                                                                                                                                                                                                                                     | 1,2,5–8    |
| Obesity Canada   | Body habitus            | Measuring body mass index (BMI; weight [kg] , height [m <sup>2</sup> ]) in all adults, and children and adolescents (aged 2 years and older). (Grade A, Level 3)                                                                                                                                                                                                                                                                                                                                                                                                                                                                                                                                                                                                                                                                                                                             | 1–4        |
| Obesity Canada   | Body habitus            | Screening for eating disorders, depression and psychiatric disorders, as appropriate. (Grade B, Level 3)                                                                                                                                                                                                                                                                                                                                                                                                                                                                                                                                                                                                                                                                                                                                                                                     | 1,9–20     |
| Obesity Canada   | Body habitus            | Additional investigations, such as liver enzyme tests, urinalysis and sleep studies (when appropriate), to screen for and exclude other common obesity-related health problems. (Grade B, Level 3)                                                                                                                                                                                                                                                                                                                                                                                                                                                                                                                                                                                                                                                                                           | 1,21–23    |
| CACR             | Cardiac rehab           | All cardiac rehabilitation patients should be asked at the intake assessment about current and recent levels of alcohol consumption. (Requisite)                                                                                                                                                                                                                                                                                                                                                                                                                                                                                                                                                                                                                                                                                                                                             | 24         |
| CACR             | Cardiac rehab           | All cardiac rehabilitation patients should undergo screening for active and historical depression and anxiety at the time of the intake assessment. (Requisite)                                                                                                                                                                                                                                                                                                                                                                                                                                                                                                                                                                                                                                                                                                                              | 24–30      |
| CACR             | Cardiac rehab           | All cardiac rehabilitation patients should undergo screening for potential sleep disorders (Requisite)                                                                                                                                                                                                                                                                                                                                                                                                                                                                                                                                                                                                                                                                                                                                                                                       | 24         |
| CACR             | Cardiac rehab           | All patients entering cardiac rehabilitation programs should be asked about their smoking status (smoker, former smoker, never smoked, passive smoker) and this should be documented on their health record. (Requisite)                                                                                                                                                                                                                                                                                                                                                                                                                                                                                                                                                                                                                                                                     | 31         |
| CACR             | Cardiac rehab           | All patients entering cardiac rehabilitation programs must have a medical assessment and undergo determination of their cardiometabolic fitness prior to the initiation of therapy. (Requisite)                                                                                                                                                                                                                                                                                                                                                                                                                                                                                                                                                                                                                                                                                              | 32         |
| CACR             | Cardiac rehab           | A directly supervised GXT is recommended as part of the initial cardiac rehabilitation assessment prior to the initiation of therapy. (Requisite)                                                                                                                                                                                                                                                                                                                                                                                                                                                                                                                                                                                                                                                                                                                                            | 32         |
| CDA              | Coronary artery disease | In the following individuals, in addition to CAD risk assessment, a baseline resting ECG should be performed in: all individuals > 40 years of age; all individuals with duration of diabetes > 15 years; all individuals (regardless of age) with hypertension, proteinuria, reduced pulses or vascular bruits; a repeat resting ECG should be performed every 2 years in people considered at high risk for CV events. (Grade D)                                                                                                                                                                                                                                                                                                                                                                                                                                                           | 33         |
| CDA              | Diabetes                | All individuals should be evaluated annually for type 2 diabetes risk on the basis of demographic and clinical criteria. (Grade D)                                                                                                                                                                                                                                                                                                                                                                                                                                                                                                                                                                                                                                                                                                                                                           | 34         |
| CDA              | Diabetes                | Screening for diabetes using an FPG should be performed every 3 years in individuals 40 years of age. More frequent and/or earlier testing with either a fasting plasma glucose test or a 2hPG in a 75-g OGTT should be considered in people with additional risk factors for diabetes. These risk factors include: first-degree relative with type 2 diabetes; member of high-risk population (e.g., people of Aboriginal, Hispanic, Asian, South Asian or African descent); history of IGT or IFG; presence of complications associated with diabetes; vascular disease (coronary, cerebrovascular or peripheral); history of gestational diabetes; mellitus; history of delivery of a macrosomic infant; hypertension; dyslipidemia; overweight; abdominal obesity; polycystic ovary syndrome; acanthosis nigricans; schizophrenia; and other risk factors (see CDA Guidelines) (Grade D) | 34,35      |
| CDA              | Diabetes                | Testing with a 2hPG in a 75-g OGTT should be undertaken in individuals with an FPG of 6.1 to 6.9 mmol/L in order to identify individuals with IGT or diabetes. (Grade D)                                                                                                                                                                                                                                                                                                                                                                                                                                                                                                                                                                                                                                                                                                                     | 34,36      |
| CDA              | Diabetes                | Testing with a 2hPG in a 75-g OGTT may be undertaken in individuals with an FPG of 5.6 to 6.0 mmol/L and ≥ 1 risk factors in order to identify individuals with IGT or diabetes. (Grade D)                                                                                                                                                                                                                                                                                                                                                                                                                                                                                                                                                                                                                                                                                                   | 34,36      |
| Obesity Canada   | Obesity                 | Fasting plasma glucose level and determining lipid profile (total cholesterol, triglycerides, LDL-C, HDL-C and TC:HDL-C ratio). (Grade A, Level 3)                                                                                                                                                                                                                                                                                                                                                                                                                                                                                                                                                                                                                                                                                                                                           | 1          |
| CHEP             | Hypertension            | Blood pressure of all adults should be measured whenever it is appropriate by                                                                                                                                                                                                                                                                                                                                                                                                                                                                                                                                                                                                                                                                                                                                                                                                                | 37         |

|                               |                               |                                                                                                                                                                                                                                                                                                                                                                                                                                                                                                                                                                                                                                                                                                                                                                                                          |             |
|-------------------------------|-------------------------------|----------------------------------------------------------------------------------------------------------------------------------------------------------------------------------------------------------------------------------------------------------------------------------------------------------------------------------------------------------------------------------------------------------------------------------------------------------------------------------------------------------------------------------------------------------------------------------------------------------------------------------------------------------------------------------------------------------------------------------------------------------------------------------------------------------|-------------|
|                               |                               | health care professionals using standardized techniques. (Grade D)                                                                                                                                                                                                                                                                                                                                                                                                                                                                                                                                                                                                                                                                                                                                       |             |
| <b>CCS dyslipidemia</b>       | <b>Lipid screening</b>        | Screening of the plasma lipid profile is recommended in adult men who are at least 40 years of age, and in women who are at least 50 years of age or postmenopausal (class I, level C).                                                                                                                                                                                                                                                                                                                                                                                                                                                                                                                                                                                                                  | 38          |
| <b>CACR</b>                   | <b>Smoking cessation</b>      | All patients should be asked if they use tobacco and should have their tobacco use status documented on a regular basis. (Evidence Level A)                                                                                                                                                                                                                                                                                                                                                                                                                                                                                                                                                                                                                                                              | 39–48       |
| <b>Stroke Network</b>         | <b>Stroke rehabilitation</b>  | All people at risk of stroke should have their blood pressure measured at each health care encounter, but no less than once annually. (Evidence Level C)                                                                                                                                                                                                                                                                                                                                                                                                                                                                                                                                                                                                                                                 | 49–52       |
| <b>Stroke Network</b>         | <b>Stroke rehabilitation</b>  | People at risk of stroke and patients who have had a stroke should be assessed for vascular disease risk factors and lifestyle management issues (diet, sodium intake, exercise, weight, smoking and alcohol intake). They should receive information and counselling about possible strategies to modify their lifestyle and risk factors. (Evidence Level B)                                                                                                                                                                                                                                                                                                                                                                                                                                           | 49,51,53–55 |
| <b>2. DIAGNOSTIC</b>          |                               |                                                                                                                                                                                                                                                                                                                                                                                                                                                                                                                                                                                                                                                                                                                                                                                                          |             |
| <b>CHEP</b>                   | <b>Hypertension</b>           | Routine laboratory tests that should be performed for the investigation of all patients with hypertension include: i) urinalysis; (Grade D) ii) blood chemistry (potassium, sodium, and creatinine) (Grade D); iii) fasting blood glucose (Grade D) ; iv) fasting serum total cholesterol and high density lipoprotein cholesterol, low density lipoprotein cholesterol and triglycerides (Grade D); and v) standard 12-lead electrocardiography.(Grade C)                                                                                                                                                                                                                                                                                                                                               | 37          |
| <b>CHEP</b>                   | <b>Hypertension</b>           | Patients with hypertension and evidence of heart failure should have an objective assessment of left ventricular ejection fraction, either by echocardiogram or nuclear imaging. (Grade D)                                                                                                                                                                                                                                                                                                                                                                                                                                                                                                                                                                                                               | 37          |
| <b>CHEP</b>                   | <b>Hypertension</b>           | The use of home blood pressure monitoring on a regular basis should be considered for patients with hypertension, particularly those with: a. diabetes mellitus (Grade D); b. chronic kidney disease (Grade C); c. suspected non-adherence (Grade D); d. demonstrated white coat effect (Grade C); and e. blood pressure controlled in the office but not at home (masked hypertension) (Grade C).                                                                                                                                                                                                                                                                                                                                                                                                       | 37          |
| <b>3. RISK STRATIFICATION</b> |                               |                                                                                                                                                                                                                                                                                                                                                                                                                                                                                                                                                                                                                                                                                                                                                                                                          |             |
| <b>CACR</b>                   | <b>Cardiac rehabilitation</b> | All patients entering cardiac rehabilitation programs must have a medical assessment and undergo determination of their cardiometabolic fitness prior to the initiation of therapy. (Requisite)                                                                                                                                                                                                                                                                                                                                                                                                                                                                                                                                                                                                          | 32          |
| <b>CDA</b>                    | <b>Diabetes</b>               | Assessment for coronary artery disease risk should be performed periodically in people with diabetes and should include: CV history (dyspnea, chest discomfort); lifestyle (smoking, sedentary lifestyle, poor eating habits); duration of diabetes; sexual function history; abdominal obesity; lipid profile; blood pressure; reduced pulses or bruits; glycemic control; presence of retinopathy; estimated glomerular filtration rate and random albumin to creatinine ratio; periodic electrocardiograms as indicated. (Grade D)                                                                                                                                                                                                                                                                    | 56          |
| <b>CDA</b>                    | <b>Diabetes</b>               | The following individuals with diabetes should be considered at high risk for CV events: men age $\geq 45$ years, women aged $\geq 50$ years (Grade B, Level 2); men $< 45$ years and women $< 50$ years with $\geq 1$ of the following (Grade D, Consensus): macrovascular disease (e.g., silent myocardial infarction or ischemia, evidence of peripheral arterial disease, carotid arterial disease or cerebrovascular disease); microvascular disease (especially nephropathy and retinopathy); multiple additional risk factors, especially with a family history of premature coronary or cerebrovascular disease in first-degree relative; extreme level of a single risk factor (e.g., LDL-C $> 5.0$ mmol/L, systolic BP $> 180$ mm Hg); duration of diabetes $> 15$ years with age $> 30$ years | 56          |
| <b>4. TREATMENT TARGETS</b>   |                               |                                                                                                                                                                                                                                                                                                                                                                                                                                                                                                                                                                                                                                                                                                                                                                                                          |             |
| <b>Stroke prevention</b>      | <b>Alcohol consumption</b>    | Two or fewer standard drinks per day; and fewer than 14 drinks per week for men; and fewer than 9 drinks per week for women. (Evidence Level C)                                                                                                                                                                                                                                                                                                                                                                                                                                                                                                                                                                                                                                                          | 49,52,57–62 |
| <b>CHEP</b>                   | <b>Body habitus</b>           | Maintenance of a healthy body weight (body mass index 18.5 to 24.9 kg/m <sup>2</sup> , and waist circumference less than 102 cm for men and less than 88 cm for women) is recommended for nonhypertensive individuals to prevent hypertension (Grade C) and for hypertensive patients to reduce blood pressure (Grade B). All overweight hypertensive individuals should be advised to lose weight. (Grade B)                                                                                                                                                                                                                                                                                                                                                                                            | 63          |
| <b>CDA</b>                    | <b>Body habitus</b>           | Adults with class III obesity (BMI $\geq 40.0$ kg/m <sup>2</sup> ) or class II obesity (BMI 35.0 to 39.9 kg/m <sup>2</sup> ) with other comorbidities may be considered for bariatric surgery when other lifestyle interventions are inadequate in achieving weight goals. (Grade C, Level 3)                                                                                                                                                                                                                                                                                                                                                                                                                                                                                                            | 64,65       |
| <b>Obesity Canada</b>         | <b>Body habitus</b>           | A nutritionally balanced diet (designed to reduce energy intake) should be combined with other supportive interventions to achieve a healthy body weight in overweight and obese people of all ages and to ensure the maintenance of growth in adolescents and youth. (Grade C, Level 4)                                                                                                                                                                                                                                                                                                                                                                                                                                                                                                                 | 66–71       |
| <b>CDA</b>                    | <b>Diabetes</b>               | Glycemic targets must be individualized; however, therapy in most individuals                                                                                                                                                                                                                                                                                                                                                                                                                                                                                                                                                                                                                                                                                                                            | 72–77       |

|                                          |                     |                                                                                                                                                                                                                                                                                                                                                                  |                |
|------------------------------------------|---------------------|------------------------------------------------------------------------------------------------------------------------------------------------------------------------------------------------------------------------------------------------------------------------------------------------------------------------------------------------------------------|----------------|
|                                          |                     | with type 1 or type 2 diabetes should be targeted to achieve an $A_{1C} \leq 7.0\%$ in order to reduce the risk of microvascular (Grade A, Level 1A) and, in individuals with type 1 diabetes, macrovascular complications. (Grade C, Level 3)                                                                                                                   |                |
| <b>CDA</b>                               | <b>Diabetes</b>     | A target $A_{1C}$ of $\leq 6.5\%$ may be considered in some patients with type 2 diabetes to further lower the risk of nephropathy (Grade A, Level 1A), but this must be balanced against the risk of hypoglycemia (Grade A, Level 1A) and increased mortality in patients who are at significantly elevated risk of cardiovascular disease. (Grade A, Level 1A) | 72,76,77       |
| <b>5. HEALTH BEHAVIOUR INTERVENTIONS</b> |                     |                                                                                                                                                                                                                                                                                                                                                                  |                |
| <b>Stroke Network</b>                    | <b>Diet</b>         | In all adults<br>High in fresh fruits, vegetables, low-fat dairy products, dietary and soluble fibre, whole grains and protein from plant sources and low in saturated fat, cholesterol and sodium, in accordance with Canada's Food Guide to Healthy Eating. (Evidence Level B)                                                                                 | 49,52,55,57-61 |
| <b>CHEP</b>                              | <b>Diet</b>         | In hypertension<br>For prevention and treatment of hypertension, a dietary sodium intake of 1500 mg (65 mmol) per day is recommended for adults age 50 years or less; 1300 mg (57 mmol) per day if age 51 to 70 years; and 1200 mg (52 mmol) per day if age greater than 70 years.                                                                               | 52             |
| <b>CDA</b>                               | <b>Diet</b>         | In diabetes<br>Adults with diabetes should consume no more than 7% of total daily energy from saturated fats and should limit intake of trans fatty acids to a minimum. (Grade D, Consensus)                                                                                                                                                                     | 78             |
| <b>CACR</b>                              | <b>Diet</b>         | All patients should be asked about their dietary habits on a regular basis and this should be documented on their health record.                                                                                                                                                                                                                                 | 79             |
| <b>CHEP</b>                              | <b>Diet</b>         | Sodium: The recommended daily sodium intake from all sources is the adequate intake by age. For persons 9-50 years, the adequate intake is 1500 mg. Adequate intake decreases to 1300 mg for people 50-70 years and to 1200 mg for people > 70 years. A daily upper consumption limit of 2300 mg should not be exceeded by any age group. (Evidence Level B)     | 63,80          |
| <b>Obesity Canada</b>                    | <b>Diet</b>         | An optimal dietary plan for achieving healthy body weight and dietary counseling for adults should be developed with a qualified and experienced health professional (preferably a registered dietitian) together with the individual and family to meet their needs. (Grade B, Level 2)                                                                         | 66,81-83       |
| <b>Obesity Canada</b>                    | <b>Diet</b>         | A nutritionally balanced diet (designed to reduce energy intake) should be combined with other supportive interventions to achieve a healthy body weight in overweight and obese people of all ages. (Grade C, Level 4)                                                                                                                                          | 66             |
| <b>Obesity Canada</b>                    | <b>Diet</b>         | A high-protein or a low-fat diet (within acceptable macronutrient distribution ranges indicated in the Dietary Reference Intakes) is suggested as a reasonable short-term (6-12 months) treatment option for obese adults as part of a weight-loss program. (Grade B, Level 2)                                                                                   | 66,85,86       |
| <b>Obesity Canada</b>                    | <b>Diet</b>         | Meal replacements may be considered as a component of an energy-reduced diet for selected adults interested in commencing a dietary weight-loss program. (Grade C, Level 2)                                                                                                                                                                                      | 66,86,87       |
| <b>CCS Dyslipidemia</b>                  | <b>Dyslipidemia</b> | Treatment target is based on the person's risk level.<br>High risk: LDL-C < 2.0 mmol/L or 50% in LDL-C; alternate target: apoB < 0.80 g/L.<br>Moderate risk: LDL-C < 2.0 mmol/L or 50% in LDL-C; alternate target: apoB < 0.80 g/L.<br>Low risk: If LDL-C $\geq 5.0$ mmol/L, reduce LDL-C $\geq 50\%$ ; apoB < 0.90 g/L.                                         | 38             |
| <b>CHEP</b>                              | <b>Hypertension</b> | Antihypertensive therapy should be strongly considered if systolic blood pressure readings average 140 mm Hg or higher in the presence of macrovascular target organ damage. (Grade C for 140 mm Hg to 160 mm Hg; Grade A for higher than 160 mm Hg)                                                                                                             | 63             |
| <b>CHEP</b>                              | <b>Hypertension</b> | For patients with nondiabetic chronic kidney disease, target blood pressure is < 130/80 mm Hg. (Grade C)                                                                                                                                                                                                                                                         | 63             |
| <b>CHEP</b>                              | <b>Hypertension</b> | People with diabetes mellitus should be treated to attain systolic blood pressures of less than 130 mm Hg (Grade C) and diastolic blood pressures of less than 80 mm Hg (Grade A). (These target blood pressure levels are the same as the blood pressure treatment thresholds.)                                                                                 | 63             |
| <b>CHEP</b>                              | <b>Hypertension</b> | Antihypertensive therapy should be strongly considered if diastolic blood pressure readings average 90 mm Hg or higher in the presence of macrovascular target organ damage or other independent cardiovascular risk factors. (Grade A)                                                                                                                          | 63             |
| <b>Obesity Canada</b>                    | <b>Obesity</b>      | Adults with class III obesity (BMI $\geq 40.0$ ) or class II obesity (BMI 35.0 to 39.9) with other comorbidities may be considered for bariatric surgery when other lifestyle interventions are inadequate in achieving weight goals. (Grade B,                                                                                                                  | 88,89          |

|                                 |                                         |                                                                                                                                                                                                                                                                                                                                                                                                                                                                                                                      |           |
|---------------------------------|-----------------------------------------|----------------------------------------------------------------------------------------------------------------------------------------------------------------------------------------------------------------------------------------------------------------------------------------------------------------------------------------------------------------------------------------------------------------------------------------------------------------------------------------------------------------------|-----------|
|                                 |                                         | Level 2)                                                                                                                                                                                                                                                                                                                                                                                                                                                                                                             |           |
| Obesity Canada                  | Obesity                                 | The initial weight loss goal in obese individuals should be 5% to 10% of baseline body weight. (No Grade or Level assigned)                                                                                                                                                                                                                                                                                                                                                                                          | 90        |
| Obesity Canada                  | Obesity                                 | Primary care health professionals are encouraged to create a nonjudgmental atmosphere when discussing weight management. (Grade C, Level 4)                                                                                                                                                                                                                                                                                                                                                                          | 66        |
| Obesity Canada                  | Obesity                                 | Health care professionals are encouraged to consider the barriers people might have concerning obesity and its management. (Grade C, Level 4)                                                                                                                                                                                                                                                                                                                                                                        | 66        |
| Obesity Canada                  | Obesity                                 | A comprehensive healthy lifestyle intervention is recommended for overweight and obese people. (Grade A, Level 1)                                                                                                                                                                                                                                                                                                                                                                                                    | 66, 91–94 |
| Obesity Canada                  | Obesity                                 | All those considering initiating a vigorous exercise program are encouraged to consult their physician or health care team professionals. (Grade C, Level 4)                                                                                                                                                                                                                                                                                                                                                         | 66        |
| Obesity Canada                  | Obesity                                 | Long-term, regular physical activity is suggested, which is associated with maintenance of body weight or a modest reduction in body weight for all overweight and obese people. (Grade B, Level 2)                                                                                                                                                                                                                                                                                                                  | 67,95,96  |
| Obesity Canada                  | Obesity                                 | Physical activity and exercise should be sustainable and tailored to the individual. The total duration should be increased gradually to maximize the weight-loss benefits. (Grade A, Level 2)                                                                                                                                                                                                                                                                                                                       | 97–99     |
| CSEP                            | Physical activity                       | Adults aged 18–64 years and older adults 65 and over should accumulate 150 minutes/week of moderate intensity physical activity in periods of at least 10 minutes each. Greater amounts of activity and more vigorous activity provide additional benefits. (Grade A, Level 2)                                                                                                                                                                                                                                       | 100–104   |
| CSEP                            | Physical activity                       | Engage in resistance activities on 2–4 days per week. (Grade A, Level 2)                                                                                                                                                                                                                                                                                                                                                                                                                                             | 100–106   |
| CSEP                            | Physical activity                       | Engage in flexibility activities 4–7 days per week. (Grade A, Level 3)                                                                                                                                                                                                                                                                                                                                                                                                                                               | 100–106   |
| CACR                            | Smoking cessation                       | All smokers should receive nonjudgmental, clear, and unambiguous advice to consider making a quit attempt using a clear, personalized message. (Requisite)                                                                                                                                                                                                                                                                                                                                                           | 31,39     |
| CACR                            | Smoking cessation                       | All physicians, nurses and other health care workers should strongly advise all patients who smoke to quit and provide brief advice. (Requisite)                                                                                                                                                                                                                                                                                                                                                                     | 31,39     |
| CACR                            | Smoking cessation                       | All patients entering cardiac rehabilitation should be asked about their smoking status (smoker, former smoker, never smoked, passive smoker) and this should be documented on their health record. (Requisite)                                                                                                                                                                                                                                                                                                      | 31,39     |
| CHEP                            | Stroke rehabilitation                   | Following the acute phase of a stroke, patients should have their blood pressure chronically controlled to a target of less than 140/90 mm Hg. (Grade C)                                                                                                                                                                                                                                                                                                                                                             | 63        |
| <b>6. PHARMACOLOGIC THERAPY</b> |                                         |                                                                                                                                                                                                                                                                                                                                                                                                                                                                                                                      |           |
| CDA                             | Diabetes                                | As beta blockers provide similar or enhanced survival benefit in patients with diabetes and MI compared to patients without diabetes, they should be prescribed and not withheld because of concern about the risks associated with hypoglycemia. (Grade D, consensus)                                                                                                                                                                                                                                               | 107       |
| CDA                             | Diabetes                                | Unless contraindicated, metformin may be used in people with type 2 diabetes and heart failure. (Grade C, Level 3)                                                                                                                                                                                                                                                                                                                                                                                                   | 108–110   |
| CCS Dyslipidemia                | Dyslipidemia                            | LDL Therapies. Statin monotherapy is the initial treatment of choice in patients whose LDL level is elevated based on their level of CVD risk (moderate and high-risk patients LDL > 2.0 mmol/L or Apo-B > 0.80: (Class 1, Level A); low risk patients.                                                                                                                                                                                                                                                              | 38        |
| CCS Dyslipidemia                | Dyslipidemia                            | HDL Therapies. No current pharmacological interventions for increasing HDL are available.                                                                                                                                                                                                                                                                                                                                                                                                                            | 38        |
| CCS Dyslipidemia                | Dyslipidemia                            | Triglyceride therapies. In patients with extreme hypertriglyceridemia (>10.0 mmol/L), fibrates may prevent pancreatitis (Class IIB, Level C)                                                                                                                                                                                                                                                                                                                                                                         | 38,111    |
| CCS Dyslipidemia                | Dyslipidemia                            | Combination therapies. A minority of patients requiring pharmacological therapy will require combination therapy (cholestyramine, ezetimibe, niacin, fibrates) to achieve, or move closer to, LDL treatment targets. (No Grade or Level assigned)                                                                                                                                                                                                                                                                    | 38        |
| CHEP                            | Hypertension                            | Initial therapy should consist of monotherapy with a thiazide diuretic (Grade A); a beta blocker (in patients younger than 60 years) (Grade B); an ACE inhibitor (in non-blacks) (Grade B); a long acting CCB (Grade B); or an ARB (Grade B). If there are adverse effects, another drug from this group should be substituted. Hypokalemia should be avoided in patients treated with thiazide diuretic monotherapy. (Grade C)                                                                                      | 63        |
| CHEP                            | Hypertension                            | Additional antihypertensive drugs should be used if target blood pressure levels are not achieved with standard dose monotherapy (Grade B). Add-on drugs should be chosen from first line choices (Grade D). Useful choices include a thiazide diuretic (Grade C) or CCB with an ACE inhibitor (Grade B), ARB or a beta blocker (Grade D). Caution should be exercised in combining a nondihydropyridine CCB and a beta blocker (Grade D). The combination of an ACE inhibitor and ARB is not recommended. (Grade A) | 63        |
| CHEP                            | Hypertension and chronic kidney disease | Thiazide diuretics are recommended as additive antihypertensive therapy. For patients with chronic kidney disease and volume overload, loop diuretics are an alternative. (Grade D)                                                                                                                                                                                                                                                                                                                                  | 63        |

|                                                                                                                                                                                                                                                                                                                                                                                                                                                                                                                                                                                                                                                                                                                                                                                   |                                         |                                                                                                                                                                                                                                                                                                                                                                                                                                                                                                                                                                                                                                                                                                                                                                                         |                         |
|-----------------------------------------------------------------------------------------------------------------------------------------------------------------------------------------------------------------------------------------------------------------------------------------------------------------------------------------------------------------------------------------------------------------------------------------------------------------------------------------------------------------------------------------------------------------------------------------------------------------------------------------------------------------------------------------------------------------------------------------------------------------------------------|-----------------------------------------|-----------------------------------------------------------------------------------------------------------------------------------------------------------------------------------------------------------------------------------------------------------------------------------------------------------------------------------------------------------------------------------------------------------------------------------------------------------------------------------------------------------------------------------------------------------------------------------------------------------------------------------------------------------------------------------------------------------------------------------------------------------------------------------------|-------------------------|
| <b>CHEP</b>                                                                                                                                                                                                                                                                                                                                                                                                                                                                                                                                                                                                                                                                                                                                                                       | <b>Hypertension &amp; diabetes</b>      | For persons with diabetes and normal urinary albumin excretion and without chronic kidney disease, with BP $\geq$ 130/80 mm Hg, despite lifestyle interventions: any of the following medications (listed in alphabetical order) is recommended, with special consideration to ACE inhibitors (Grade A for 55 and older; Grade B under 55) and ARBs (Grade A; Grade B) given their additional renal benefits; thiazide-like diuretic. If the above drugs are contraindicated or cannot be tolerated, a cardioselective beta blocker or non-DHP CCB can be substituted; additional antihypertensive drugs should be used if target BP levels are not achieved with standard-dose monotherapy. Add-on drugs should be chosen from the first-line choices listed above. (Grade A; Grade B) | 63                      |
| <b>CHEP</b>                                                                                                                                                                                                                                                                                                                                                                                                                                                                                                                                                                                                                                                                                                                                                                       | <b>Hypertension &amp; diabetes</b>      | Alpha-blockers are not recommended as first-line agents for the treatment of hypertension in persons with diabetes. (Grade A)                                                                                                                                                                                                                                                                                                                                                                                                                                                                                                                                                                                                                                                           | 63                      |
| <b>CHEP</b>                                                                                                                                                                                                                                                                                                                                                                                                                                                                                                                                                                                                                                                                                                                                                                       | <b>Hypertension &amp; heart disease</b> | In patients with systolic dysfunction, an ARB is recommended if ACE inhibitors are not tolerated. (Grade A)                                                                                                                                                                                                                                                                                                                                                                                                                                                                                                                                                                                                                                                                             | 63                      |
| <b>CHEP</b>                                                                                                                                                                                                                                                                                                                                                                                                                                                                                                                                                                                                                                                                                                                                                                       | <b>Hypertension &amp; heart disease</b> | For hypertensive patients with heart failure whose blood pressure is not controlled, an ARB may be added to an ACE inhibitor and other antihypertensive drug treatment (Grade A). Careful monitoring should be used if combining an ACE inhibitor and an ARB due to potential adverse effects such as hypotension, hyperkalemia and worsening renal function (Grade C). Additional therapies may also include dihydropyridine CCBs. (Grade C)                                                                                                                                                                                                                                                                                                                                           | 63                      |
| <b>CHEP</b>                                                                                                                                                                                                                                                                                                                                                                                                                                                                                                                                                                                                                                                                                                                                                                       | <b>Hypertension &amp; heart disease</b> | An ACE inhibitor or ARB is recommended for most patients with hypertension and coronary artery disease. (Grade A)                                                                                                                                                                                                                                                                                                                                                                                                                                                                                                                                                                                                                                                                       | 63,112–116              |
| <b>CHEP</b>                                                                                                                                                                                                                                                                                                                                                                                                                                                                                                                                                                                                                                                                                                                                                                       | <b>Hypertension &amp; heart disease</b> | In high-risk coronary artery disease patients, when combination therapy is being used, choices should be individualized. The combination of an ACE inhibitor and a dihydropyridine CCB is preferable to an ACE inhibitor and a diuretic in selected patients. (Grade A)                                                                                                                                                                                                                                                                                                                                                                                                                                                                                                                 | 63,113–116              |
| <b>CHEP</b>                                                                                                                                                                                                                                                                                                                                                                                                                                                                                                                                                                                                                                                                                                                                                                       | <b>Hypertension &amp; heart disease</b> | For patients with stable angina, beta-blockers are preferred as initial therapy (Grade B). CCBs may also be used. (Grade B)                                                                                                                                                                                                                                                                                                                                                                                                                                                                                                                                                                                                                                                             | 63,112–116              |
| <b>CHEP</b>                                                                                                                                                                                                                                                                                                                                                                                                                                                                                                                                                                                                                                                                                                                                                                       | <b>Hypertension &amp; heart disease</b> | For patients with recent myocardial infarction, initial therapy should include both a beta-blocker and an ACE inhibitor (Grade A). An ARB can be used if the patient is intolerant of an ACE inhibitor. (Grade A)                                                                                                                                                                                                                                                                                                                                                                                                                                                                                                                                                                       | 63,112–116              |
| <b>CHEP</b>                                                                                                                                                                                                                                                                                                                                                                                                                                                                                                                                                                                                                                                                                                                                                                       | <b>Hypertension &amp; stroke</b>        | For patients with stroke, the combination of an ACE inhibitor and ARB is not recommended. Treatment with an ACE inhibitor/diuretic combination is preferred. (Grade B)                                                                                                                                                                                                                                                                                                                                                                                                                                                                                                                                                                                                                  | 63                      |
| <b>Stroke Network</b>                                                                                                                                                                                                                                                                                                                                                                                                                                                                                                                                                                                                                                                                                                                                                             | <b>Atrial fibrillation &amp; stroke</b> | For the secondary prevention of stroke, patients with atrial fibrillation who have had a stroke/TIA should be treated with warfarin at a target international normalized ratio of 2.5, range 2.0 to 3.0, (target international normalized ratio of 3.0 for mechanical cardiac valves, range 2.5 to 3.5) if they are likely to be compliant with the required monitoring and are not at high risk for bleeding complications. (Grade A)                                                                                                                                                                                                                                                                                                                                                  | 49,57–63,117–128        |
| <b>CHEP</b>                                                                                                                                                                                                                                                                                                                                                                                                                                                                                                                                                                                                                                                                                                                                                                       | <b>Hypertension &amp; stroke</b>        | Strong consideration should be given to the initiation of antihypertensive therapy after the acute phase of a stroke or transient ischemic attack.                                                                                                                                                                                                                                                                                                                                                                                                                                                                                                                                                                                                                                      | 63                      |
| <b>CHEP</b>                                                                                                                                                                                                                                                                                                                                                                                                                                                                                                                                                                                                                                                                                                                                                                       | <b>Stroke</b>                           | Antiplatelet therapy: All patients with ischemic stroke or transient ischemic attack should be prescribed antiplatelet therapy for secondary prevention of recurrent stroke unless there is an indication for anticoagulation. (Level A)                                                                                                                                                                                                                                                                                                                                                                                                                                                                                                                                                | 49,51,57–61,117,118,123 |
| <b>CHEP</b>                                                                                                                                                                                                                                                                                                                                                                                                                                                                                                                                                                                                                                                                                                                                                                       | <b>Stroke</b>                           | ASA, combined ASA (25 mg) and extended-release dipyridamole (200 mg), or clopidogrel 75 mg are all appropriate options and selection should depend on the clinical circumstances. (Evidence Level A)                                                                                                                                                                                                                                                                                                                                                                                                                                                                                                                                                                                    | 57–61,63,117,118,123    |
| 2hPG = 2-h postchallenge glycemia test, apoB = apolipoprotein B, BP = blood pressure, CACR = Canadian Association of Cardiac Rehabilitation, CAD = coronary artery disease, CCB = calcium channel blocker, CCS = Canadian Cardiovascular Society, CDA = Canadian Diabetes Association, CHEP = Canadian Hypertension Education Program, CSEP = Canadian Society for Exercise Physiology, CV = cardiovascular, DHP = dihydropyridine, ECG = electrocardiogram, FPG = fasting plasma glucose test, GXT = graded exercise test, HDL-C = high-density lipoprotein cholesterol, IGT = impaired glucose tolerance, IFG = impaired fasting glycemia, LDL-C = low-density lipoprotein cholesterol, MI = myocardial infarction, OGTT = oral glucose tolerance test, TC = total cholesterol. |                                         |                                                                                                                                                                                                                                                                                                                                                                                                                                                                                                                                                                                                                                                                                                                                                                                         |                         |

## References

1. Lau DC, Douketis JD, Morrison KM, Hramiak IM, Sharma AM, Ur E. 2006 Canadian clinical practice guidelines on the management and prevention of obesity in adults and children [summary]. *CMAJ* 2007;176:S7.
2. The practical guide: identification, evaluation, and treatment of overweight and obesity in adults. Bethesda Md.: National Institutes of Health; 2000. Publ. no. 00- 4084. Available: [www.nhlbi.nih.gov/guidelines/obesity/prctgd\\_b.pdf](http://www.nhlbi.nih.gov/guidelines/obesity/prctgd_b.pdf) (accessed 2006 Dec 27).

3. Dickey RA, Bartuska DG, Bray GW, et al. ACCE/ACE position statement on the prevention, diagnosis, and treatment of obesity. *Endocr Pract* 1998;4:297-330. Available: [www.aace.com/pub/pdf/guidelines/obesityguide.pdf](http://www.aace.com/pub/pdf/guidelines/obesityguide.pdf) (accessed 2007 Jan 20).
4. Lyznicki JM, Young DC, Riggs JA, et al. Obesity: assessment and management in primary care. *Am Fam Physician* 2001;63:2185-96.
5. Genest J, Frohlich J, Fodor G, et al. Recommendations for the management of dyslipidemia and the prevention of cardiovascular disease: summary of the 2003 update. *CMAJ* 2003;169:921-4.
6. Allison DB, Mentore JL, Heo M, et al. Antipsychotic-induced weight gain: a comprehensive research synthesis. *Am J Psychiatry* 1999;156:1686-96.
7. Wetterling T. Body weight gain with atypical antipsychotics. A comparative review. *Drug Saf* 2001;24:59-73.
8. Daniels SR, Arnett DK, Eckel RH, et al. Overweight in children and adolescents: pathophysiology, consequences, prevention, and treatment. *Circulation* 2005;111:1999-2012.
9. Roberts RE, Kaplan GA, Shema SJ, et al. Are the obese at greater risk for depression? *Am J Epidemiol* 2000;152:163-70.
10. Roberts RE, Deleger S, Strawbridge WJ, et al. Prospective association between obesity and depression: evidence from the Alameda County Study. *Int J Obes Relat Metab Disord* 2003;27:514-21.
11. Pine DS, Goldstein RB, Wolk S, et al. The association between childhood depression and adulthood body mass index. *Pediatrics* 2001;107:1049-56.
12. Goodman E, Whitaker RC. A prospective study of the role of depression in the development and persistence of adolescent obesity. *Pediatrics* 2002;110:497-504.
13. DiPietro L, Anda RF, Williamson DF, et al. Depressive symptoms and weight change in a national cohort of adults. *Int J Obes Relat Metab Disord* 1992;16:745-53.
14. Richardson LP, Davis R, Poulton R, et al. A longitudinal evaluation of adolescent depression and adult obesity. *Arch Pediatr Adolesc Med* 2003;157:739-45.
15. Ziegelstein RC, Fauerbach JA, Stevens SS, et al. Patients with depression are less likely to follow recommendations to reduce cardiac risk during recovery from a myocardial infarction. *Arch Intern Med* 2000;160:1818-23.
16. DiMatteo MR, Lepper HS, Croghan TW. Depression is a risk factor for noncompliance with medical treatment: meta-analysis of the effects of anxiety and depression on patient adherence. *Arch Intern Med* 2000;160:2101-7.
17. Linde JA, Jeffery RW, Levy RL, et al. Binge eating disorder, weight control self-efficacy, and depression in overweight men and women. *Int J Obes Relat Metab Disord* 2004;28:418-25.
18. Sherwood NE, Jeffery RW, Wing RR. Binge status as a predictor of weight loss treatment outcome. *Int J Obes Relat Metab Disord* 1999;23:485-93.
19. Unutzer J, Katon W, Williams JW Jr, et al. Improving primary care for depression in late life: the design of a multicenter randomized trial. *Med Care* 2001;39:785-99.
20. Williams JW Jr, Katon W, Lin EH, et al. The effectiveness of depression care management on diabetes-related outcomes in older patients. *Ann Intern Med* 2004;140:1015-24.
21. Chagnac A, Weinstein T, Herman M, et al. The effects of weight loss on renal function in patients with severe obesity. *J Am Soc Nephrol* 2003;14:1480-6.
22. Kambham N, Markowitz GS, Valeri AM, et al. Obesity-related glomerulopathy: an emerging epidemic. *Kidney Int* 2001;59:1498-509.

23. Van den Brandt PA, Spiegelman D, Yaun SS, et al. Pooled analysis of prospective cohort studies on height, weight, and breast cancer risk. *Am J Epidemiol* 2000;152:514-27.
24. Prior PL, Francis J, Reitav J, et al. Chapter 6. Behavioural, psychological, and functional issues. In Stone JA, Arthur HM, Suskin NG Editors. Canadian Association of Cardiac Rehabilitation National Guidelines for Cardiac Rehabilitation and Cardiovascular Disease Prevention. 3<sup>rd</sup> ed. CACR. Winnipeg, Man:2009.p.107-202.
25. Fraser-Smith N, Lesperance F, Talajic M, Bourassa MG. Gender, depression and one-year prognosis after myocardial infarction. *Psychosom Med* 1999;61:26-37.
26. Fraser-Smith N, Lesperance F, Talajic M. Depression and 18-month prognosis after myocardial infarction. *Circulation* 1995;91:999-1005.
27. Carney RM, Blumenthal JA, Catellier D, et al. Depression as a risk factor for mortality after acute myocardial infarction. *Am J Cardiol* 2003;92:1277-81.
28. Stein PK, Carney RM, Freedland KE, et al. Severe depression is associated with markedly reduced heart rate variability in patients with stable coronary artery disease. *J Psychosom Res* 2000;48:493-500
29. vonKanel R. Platelet hyperactivity in clinical depression and the beneficial effect of antidepressant drug treatment: How strong is the evidence? *Acta Psychiatr Scand* 2004;110:163-77.
30. Ziegelstein RC, Bush DE, Fauerbach JA. Depression, adherence behaviour, and coronary disease outcomes. *Arch Intern Med* 1997;157:1921-9.
31. Stone JA, Campbell NR, Genest J, et al. Chapter 9. Health behaviour interventions and cardiovascular disease risk factor modifications. In Stone JA, Arthur HM, Suskin NG Editors. Canadian Association of Cardiac Rehabilitation National Guidelines for Cardiac Rehabilitation and Cardiovascular Disease Prevention. 3<sup>rd</sup> ed. CACR. Winnipeg, Man:2009.p.251-340.
32. Stone JA, McCartney N, Millar PJ, et al. Risk stratification, exercise testing, exercise prescription, and program safety. Chapter 10. In Stone JA, Arthur HM, Suskin NG Editors. Canadian Association of Cardiac Rehabilitation National Guidelines for Cardiac Rehabilitation and Cardiovascular Disease Prevention. 3<sup>rd</sup> ed. CACR. Winnipeg, Man:2009.p.341-386.
33. Screening for the presence of coronary artery disease. Canadian Diabetes Association Clinical Practice Guidelines Expert Committee. Canadian Diabetes Association 2008 Clinical Practice Guidelines for the Prevention and Management of Diabetes in Canada. *Can J Diabetes* 2008;32 (Suppl 1):S100.
34. Screening for Diabetes. Canadian Diabetes Association Clinical Practice Guidelines Expert Committee. Canadian Diabetes Association 2008 Clinical Practice Guidelines for the Prevention and Management of Diabetes in Canada. *Can J Diabetes* 2008;32 (Suppl 1):S16
35. American Diabetes Association. Diagnosis and classification of diabetes mellitus. *Diabetes Care* 2007;30 (suppl 1):S42-7.
36. Saydah SH, Byrd-Holt D, Harris MI. Projected impact of implementing the results of the Diabetes Prevention Program in the U.S. population. *Diabetes Care* 2002;25:1940-5.
37. Quinn RR, Hemmelgarn BR, Padwal RS, et al. The 2010 Canadian Hypertension Education Program recommendations for the management of hypertension: part I - blood pressure measurement, diagnosis and assessment of risk. *Can J Cardiol* 2010;26:241-8.
38. Genest J, McPherson R, Frohlich J, et al. 2009 Canadian Cardiovascular Society/Canadian guidelines for the diagnosis and treatment of dyslipidemia and prevention of cardiovascular disease in the adult - 2009 recommendations. *Can J Cardiol* 2009;25:567-79.

39. Fiore MC, Jaén CR, Baker TB, et al. Treating Tobacco Use and Dependence: 2008 Update. Clinical Practice Guideline. Rockville, MD: U.S. Department of Health and Human Services. Public Health Service. May 2008.
40. Cohen SJ, Christen AG, Katz BP, et al. Counseling medical and dental patients about cigarette smoking: the impact of nicotine gum and chart reminders. *Am J Public Health* 1987;77:313-6.
41. Dietrich AJ, O'Connor GT, Keller A, et al. Cancer: improving early detection and prevention. A community practice randomised trial. *BMJ* 1992;304:687-91.
42. Fiore MC, Jorenby DE, Schensky AE, et al. Smoking status as the new vital sign: effect on assessment and intervention with patients who smoke. *Mayo Clin Proc* 1995;70:209-13.
43. Hahn DL, Berger MG. Implementation of a systematic health maintenance protocol in a private practice. *J Fam Pract* 1990;31:492-504.
44. Kottke TE, Solberg LI, Brekke ML, et al. A controlled trial to integrate smoking cessation advice into primary care practice: doctors helping smokers, round III. *J Fam Pract* 1992;34:701-8.
45. McIlvain HE, Susman JL, Manners MA, et al. Improving smoking cessation counseling by family practice residents. *J Fam Pract* 1992;34:745-9.
46. Robinson MD, Laurent SL, Little Jr JM. Including smoking status as a new vital sign: it works! *J Fam Pract* 1995;40:556-61.
47. Strecher VJ, O'Malley MS, Villagra VG, et al. Can residents be trained to counsel patients about quitting smoking? Results from a randomized trial. *J Gen Intern Med* 1991;6:9-17.
48. Pipe AL, Eisenberg MJ, Gupta A, et al. Smoking cessation and the cardiovascular specialist: Canadian Cardiovascular Society position statement. *Can J Cardiol* 2011;27:132-7.
49. Lindsay P, Bayley M, McDonald A, et al. Toward a more effective approach to stroke: Canadian Best Practice Recommendations for Stroke Care. *CMAJ* 2008;178:1418-25.
50. National Collaborating Centre for Chronic Conditions. Stroke: diagnosis and initial management of acute stroke and transient ischaemic attack (TIA). London (UK): National Institute for Health and Clinical Excellence; 2008. Available: [www.nice.org.uk/nicemedia/pdf/CG68NICEGuideline.pdf](http://www.nice.org.uk/nicemedia/pdf/CG68NICEGuideline.pdf) (accessed 2008 Oct 21).page 28.
51. Royal College of Physicians of London, Intercollegiate Stroke Working Party Clinical Effectiveness and Evaluation Unit. *National clinical guidelines for stroke*. 3rd ed. London (UK): The College; 2008.
52. Khan NA, Hemmelgarn B, Herman RJ, et al. Canadian Hypertension Education Program. The 2008 Canadian Hypertension Education Program recommendations for the management of hypertension: part 2 — therapy. *Can J Cardiol* 2008;24:465-75.
53. Veterans Affairs/Department of Defense, Office of Quality Performance. *Veterans Affairs/Department of Defense clinical practice guideline for management of stroke rehabilitation*. Washington (DC): US Department of Veterans Affairs; 2003. Available: [www.oqp.med.va.gov/cpg/STR/str\\_cpg/frameset.htm](http://www.oqp.med.va.gov/cpg/STR/str_cpg/frameset.htm) (accessed 2008 Oct 20).
54. National Stroke Foundation. *Clinical guidelines for acute stroke management*. Melbourne (AU): The Foundation; 2007. Available: [www.strokefoundation.com .au/acute-clinical-guidelines-for-Acute-stroke-management](http://www.strokefoundation.com.au/acute-clinical-guidelines-for-Acute-stroke-management) (accessed 2008 Oct 2008).
55. Stroke Foundation of New Zealand. *Life after stroke: New Zealand guideline for management of stroke*. Wellington (NZ): The Foundation; 2003. Available: [www.nzgg.org.nz/guidelines/0037/ACF291F.pdf](http://www.nzgg.org.nz/guidelines/0037/ACF291F.pdf) (accessed 2008 Oct 20).



56. Identification of individuals at high risk of coronary events. Canadian Diabetes Association Clinical Practice Guidelines Expert Committee. Canadian Diabetes Association 2008 Clinical Practice Guidelines for the Prevention and Management of Diabetes in Canada. *Can J Diabetes* 2008;32 (Suppl 1):S95-9.
57. Adams HP Jr, del Zoppo G, Alberts MJ, et al. Guidelines for the early management of adults with ischemic stroke. A guideline from the American Heart Association/American Stroke Association Stroke Council, Clinical Cardiology Council, Cardiovascular Radiology and Intervention Council, and the Atherosclerotic Peripheral Vascular Disease and Quality of Care Outcomes in Research Interdisciplinary Working Group. *Stroke* 2007;38:1655-711.
58. Sacco RL, Adams R, Albers G, et al. Guidelines for prevention of stroke in patients with ischemic stroke or transient ischemic attack: a statement for healthcare professionals from the American Heart Association/American Stroke Association Council on Stroke. *Stroke* 2006;37:577-617.
59. Goldstein LB, Adams R, Alberts MJ, et al. Primary prevention of ischemic stroke. A guideline from the American Heart Association/American Stroke Association Stroke Council. *Stroke* 2006;37:1583-633.
60. Broderick J, Connolly S, Feldmann E, et al. Guidelines for the management of spontaneous intracerebral hemorrhage in adults: 2007 update: a guideline from the American Heart Association/American Stroke Association Stroke Council, High Blood Pressure Research Council, and the Quality of Care and Outcomes in Research Interdisciplinary Working Group. *Stroke* 2007;38:2001-23.
61. Duncan PW, Zorowitz R, Bates B, et al. Management of adult stroke rehabilitation care: a clinical practice guideline. *Stroke* 2005;36:e100-43.
62. National Stroke Foundation. *Clinical guidelines for acute stroke management*. Melbourne (AU): The Foundation; 2007. Available: [www.strokefoundation.com.au/acute-clinical-guidelines-for-Acute-stroke-management](http://www.strokefoundation.com.au/acute-clinical-guidelines-for-Acute-stroke-management) (accessed 2008 Oct 2008).
63. Hackam DG, Khan NA, Hemmelgarn BR, et al. The 2010 Canadian Hypertension Education Program recommendations for the management of hypertension: Part 2 - therapy. *Can J Cardiol* 2010;26:249-58.
64. Management of obesity in diabetes. Canadian Diabetes Association Clinical Practice Guidelines Expert Committee. Canadian Diabetes Association 2008 Clinical Practice Guidelines for the Prevention and Management of Diabetes in Canada. *Can J Diabetes* 2008;32 (Suppl 1):S77-81.
65. Sjöström CD, Lissner L, Wedel H, et al. Reduction in incidence of diabetes, hypertension and lipid disturbances after intentional weight loss induced by bariatric surgery: the SOS Intervention Study. *Obes Res* 1999;7:477-84.
66. Lau DC, Douketis JD, Morrison KM, Hramiak IM, Sharma AM, Ur E. 2006 Canadian clinical practice guidelines on the management and prevention of obesity in adults and children [summary]. *CMAJ* 2007;176:S8.
67. Brehm BJ, Seeley RJ, Daniels SR, et al. A randomized trial comparing a very low carbohydrate diet and a calorie-restricted low fat diet on body weight and cardiovascular risk factors in healthy women. *J Clin Endocrinol Metab* 2003;88:1617-23.
68. Astrup A, Grunwald GK, Melanson EL, et al. The role of low-fat diets in body weight control: a meta-analysis of ad libitum dietary intervention studies. *Int J Obes Relat Metab Disord* 2000;24:1545-52.
69. Due A, Toubro S, Skov AR, et al. Effect of normal-fat diets, either medium or high in protein, on body weight in overweight subjects: a randomized 1-year trial. *Int J Obes Relat Metab Disord* 2004;28:1283-90.

70. Ashley JM, St Jeor ST, Perumean-Chaney S, et al. Meal replacements in weight intervention. *Obes Res* 2001;9:312S-20S.
71. Heaney RP, Davies KM, Barger-Lux MJ. Calcium and weight: clinical studies. *J Am Coll Nutr* 2002;21:152S-5S.
72. Targets for glycaemic control. Canadian Diabetes Association Clinical Practice Guidelines Expert Committee. Canadian Diabetes Association 2008 Clinical Practice Guidelines for the Prevention and Management of Diabetes in Canada. *Can J Diabetes* 2008;32 (Suppl 1):S29-31
73. The Diabetes Control and Complications Trial Research Group. The effect of intensive treatment of diabetes on the development and progression of long-term complications in insulin-dependent diabetes mellitus. *N Engl J Med* 1993;329:977-86.
74. Ohkubo Y, Kishikawa H, Araki E, et al. Intensive insulin therapy prevents the progression of diabetic microvascular complications in Japanese patients with non-insulin-dependent diabetes mellitus: a randomized prospective 6-year study. *Diabetes Res Clin Pract* 1995;28:103-117.
75. UK Prospective Diabetes Study (UKPDS) Group. Intensive blood-glucose control with sulphonylureas or insulin compared with conventional treatment and risk of complications in patients with type 2 diabetes (UKPDS 33). *Lancet* 1998;352:837-53.
76. The ADVANCE Collaborative Group. Intensive blood glucose control and vascular outcomes in patients with type 2 diabetes. *New Engl J Med* 2008;358:2560-72.
77. Nathan DM, Cleary PA, Backlund JY, et al. Intensive diabetes treatment and cardiovascular disease in patients with type 1 diabetes. *N Eng J Med* 2005;353:2643-53.
78. Nutrition therapy. Canadian Diabetes Association Clinical Practice Guidelines Expert Committee. Canadian Diabetes Association 2008 Clinical Practice Guidelines for the Prevention and Management of Diabetes in Canada. *Can J Diabetes* 2008;32 (Suppl 1):S40-5.
79. Carlson J, Monti V. Chapter 8. Nutrition and Dietary Therapy. In Stone JA, Arthur HM, Suskin NG Editors. Canadian Association of Cardiac Rehabilitation National Guidelines for Cardiac Rehabilitation and Cardiovascular Disease Prevention. 3<sup>rd</sup> ed. CACR. Winnipeg, Man:2009.p.221-50.
80. Panel on Dietary Reference Intakes for Electrolytes and Water, Standing Committee on the Scientific Evaluation of Dietary Reference Intakes. *Dietary reference intakes for water, potassium, sodium, chloride, and sulfate*. Washington (DC): Institute of Medicine; 2004.
81. Brehm BJ, Seeley RJ, Daniels SR, et al. A randomized trial comparing a very low carbohydrate diet and a calorie-restricted low fat diet on body weight and cardiovascular risk factors in healthy women. *J Clin Endocrinol Metab* 2003;88:1617-23.
82. Astrup A, Grunwald GK, Melanson EL, et al. The role of low-fat diets in body weight control: a meta-analysis of ad libitum dietary intervention studies. *Int J Obes Relat Metab Disord* 2000;24:1545-52.
83. Due A, Toubro S, Skov AR, et al. Effect of normal-fat diets, either medium or high in protein, on body weight in overweight subjects: a randomised 1-year trial. *Int J Obes Relat Metab Disord* 2004;28:1283-90.
84. Ashley JM, St Jeor ST, Perumean-Chaney S, et al. Meal replacements in weight intervention. *Obes Res* 2001;9:312S-20S.
85. Heaney RP, Davies KM, Barger-Lux MJ. Calcium and weight: clinical studies. *J Am Coll Nutr* 2002;21:152S-5S.
86. Bravata DM, Sanders L, Huang J, et al. Efficacy and safety of low-carbohydrate diets: a systematic review. *JAMA* 2003;289:1837-50.

87. Raben A. Should obese patients be counselled to follow a low-glycaemic index diet? No. *Obes Rev* 2002;3:245-56.
88. Lau DC, Douketis JD, Morrison KM, Hramiak IM, Sharma AM, Ur E. 2006 Canadian clinical practice guidelines on the management and prevention of obesity in adults and children [summary]. *CMAJ* 2007;176:S9.
89. Sjostrom L, Lindroos AK, Peltonen M, et al. Lifestyle, diabetes, and cardiovascular risk factors 10 years after bariatric surgery. *N Engl J Med* 2004;351:2683-93.
90. Lau DC, Douketis JD, Morrison KM, Hramiak IM, Sharma AM, Ur E. 2006 Canadian clinical practice guidelines on the management and prevention of obesity in adults and children [summary]. *CMAJ* 2007;176:S4.
91. Knowler WC, Barrett-Connor E, Fowler SE, et al. Reduction in the incidence of type 2 diabetes with lifestyle intervention or metformin. *N Engl J Med* 2002;346:393-403.
92. Tuomilehto J, Lindstrom J, Eriksson JG, et al. Prevention of type 2 diabetes mellitus by changes in lifestyle among subjects with impaired glucose tolerance. *N Engl J Med* 2001;344:1343-50.
93. Stevens VJ, Obarzanek E, Cook NR, et al. Long-term weight loss and changes in blood pressure: results of the Trials of Hypertension Prevention, phase II. *Ann Intern Med* 2001;134:1-11.
94. Kuller LH, Simkin-Silverman LR, Wing RR, et al. Women's Healthy Lifestyle Project: a randomized clinical trial: results at 54 months. *Circulation* 2001;103:32-7.
95. Jakicic JM, Marcus BH, Gallagher KI, et al. Effect of exercise duration and intensity on weight loss in overweight, sedentary women: a randomized trial. *JAMA* 2003;290:1323-30.
96. Pritchard JE, Nowson CA, Wark JD. A worksite program for overweight middleaged men achieves lesser weight loss with exercise than with dietary change. *J Am Diet Assoc* 1997;97:37-42.
97. Garrow JS, Summerbell CD. Meta analysis: effect of exercise, with or without dieting, on the body composition of overweight subjects. *Eur J Clin Nutr* 1995;49:1-10.
98. Miller WC, Koceja DM, Hamilton EJ. A meta-analysis of the past 25 years of weight loss research using diet, exercise or diet plus exercise intervention. *Int J Obes Relat Metab Disord* 1997;21:941-7.
99. Fogelholm M, Kukkonen-Harjula K. Does physical activity prevent weight gain — a systematic review. *Obes Rev* 2000;1:95-111.
100. Warburton DER, Charlesworth S, Ivey A, Nettlefold L, Bredin SSD: A systematic review of the evidence for Canada's Physical Activity Guidelines for Adults. *Int J Behav Nutr Phys Act* 2010, 7:39.
101. Tremblay MS, Warburton DE, Janssen I, et al. New Canadian Physical Activity Guidelines. *Appl Physiol Nutr Metab* 2011: 36–46. doi:10.1139/H11-009.
102. Shephard RJ, (Ed): Advancing physical activity measurement and guidelines in Canada: a scientific review and evidence-based foundation for the future of Canadian physical activity guidelines. *Appl Physiol Nutr Metab* 2007, 32:S1-S224.
103. US Department of Health and Human Services: 2008 Physical Activity Guidelines for Americans. Washington, DC; 2008.
104. Department of Health: At Least Five a Week: Evidence of the Impact of Physical Activity and its Relationship to Health. London 2004.
105. Warburton DE, Katzmarzyk PT, Rhodes RE, Shephard RJ. Evidence-based guidelines for physical activity of adult Canadians. *Appl Physiol Nutr Metab* 2007;32 Suppl 2F:S17-7
106. Warburton DE, Nicol C, Bredin SS: Health benefits of physical activity: the evidence. *CMAJ* 2006, 174:801-09.

107. Management of acute coronary syndromes. Canadian Diabetes Association Clinical Practice Guidelines Expert Committee. Canadian Diabetes Association 2008 Clinical Practice Guidelines for the Prevention and Management of Diabetes in Canada. *Can J Diabetes* 2008;32 (Suppl 1):S119-22.
108. Treatment of diabetes in people with heart failure. Canadian Diabetes Association Clinical Practice Guidelines Expert Committee. Canadian Diabetes Association 2008 Clinical Practice Guidelines for the Prevention and Management of Diabetes in Canada. *Can J Diabetes* 2008;32 (Suppl 1):S123-25.
109. Eurich DT, Majumdar SR, McAlister FA, et al. Improved clinical outcomes associated with metformin in patients with diabetes and heart failure. *Diabetes Care* 2005;28:2345-51.
110. Masoudi FA, Inzucchi SE, Wang Y, et al. Thiazolidinediones, metformin, and outcomes in older patients with diabetes and heart failure: an observational study. *Circulation* 2005;111:583-90.
111. Keech A, Simes RJ, Barter P, et al. Effects of long-term fenofibrate therapy on cardiovascular events in 9795 people with type 2 diabetes mellitus (the FIELD study): Randomised controlled trial. *Lancet* 2005;366:1849-61.
112. Yusuf S, Teo KK, Pogue J, et al. Telmisartan, ramipril, or both in patients at high risk for cardiovascular events. *N Engl J Med* 2008;358:1547-59.
113. Yusuf S, Teo K, Anderson C, et al. Effects of angiotensin-receptor blocker telmisartan on cardiovascular events in high-risk patients intolerant to angiotensin converting enzyme inhibitors: A randomised controlled trial. *Lancet* 2008;372:1174-83.
114. Yusuf S, Diener HC, Sacco RL, et al. Telmisartan to prevent recurrent stroke and cardiovascular events. *N Engl J Med* 2008;359:1125-37.
115. Jamerson K, Weber MA, Bakris GL, et al. Benazepril plus amlodipine or hydrochlorothiazide for hypertension in high-risk patients. *N Engl J Med* 2008;359:2417-28.
116. Weber MA, Bakris GL, Dahlof B, et al. Baseline characteristics in the Avoiding Cardiovascular events through COMBination therapy in Patients Living with Systolic Hypertension (ACCOMPLISH) trial: A hypertensive population at high cardiovascular risk. *Blood Press* 2007;16:13-9.
117. Veterans Affairs/Department of Defense, Office of Quality Performance. *Veterans Affairs/Department of Defense clinical practice guideline for management of stroke rehabilitation*. Washington (DC): US Department of Veterans Affairs; 2003. Available: [www.oqp.med.va.gov/cpg/STR/str\\_cpg/frameset.htm](http://www.oqp.med.va.gov/cpg/STR/str_cpg/frameset.htm) (accessed 2008 Oct 20).
118. National Stroke Foundation. *Clinical guidelines for acute stroke management*. Melbourne (AU): The Foundation; 2007. Available: [www.strokefoundation.com.au/acute-clinical-guidelines-for-Acute-stroke-management](http://www.strokefoundation.com.au/acute-clinical-guidelines-for-Acute-stroke-management) (accessed 2008 Oct 2008).
119. Lindsay MP, Kapral MK, Holloway R, et al. Canadian Stroke Quality of Care Study: identification of performance indicators for acute stroke care. *CMAJ* 2005;172: Online-1–8. Available: [www.cmaj.ca/cgi/content/full/172/3/363/DC1](http://www.cmaj.ca/cgi/content/full/172/3/363/DC1) (accessed 2008 Nov 3).
120. Lindsay P, Jaigobin C, Silver FL, et al. *Canadian Stroke Quality of Care Study: quality indicators and literature review for telestroke*. Toronto (ON): Canadian Stroke Network, Ontario Ministry of Health and Long-Term Care and Institute for Clinical Evaluative Sciences; 2005.
121. Lindsay P, Gladstone DJ, Silver FL, et al. *Canadian Stroke Quality of Care Study: quality indicators and literature review for stroke secondary prevention*. Toronto (ON): Canadian Stroke Network, Ontario Ministry of Health and Long Term Care and Institute of Clinical Evaluative Sciences; 2005.

122. Bayley M, Lindsay P, Teasell R, et al. *Canadian Stroke Quality of Care Study: quality indicators for stroke rehabilitation (in collaboration with SCORE)*. Toronto (ON): Canadian Stroke Network, Ontario Ministry of Health and Long-Term Care and Institute for Clinical Evaluative Sciences; 2006.
123. European Stroke Organization (ESO) Executive Committee; ESO Writing Committee. Guidelines for management of ischaemic stroke and transient ischaemic attack 2008. *Cerebrovasc Dis* 2008;25:457-507.
124. Scottish Intercollegiate Guidelines Network. *Management of patients with stroke I: Assessment, investigation, immediate management and secondary prevention* (SIGN 13). Edinburgh (UK): The Network; 1997. Available: [www.sign.ac.uk/pdf/sign13.pdf](http://www.sign.ac.uk/pdf/sign13.pdf) (accessed 2008 Oct 20).
125. Scottish Intercollegiate Guidelines Network. *Management of patients with stroke II: Management of carotid stenosis and carotid endarterectomy* (SIGN 14). Edinburgh (UK): The Network; 1997. Available: [www.sign.ac.uk/pdf/sign14.pdf](http://www.sign.ac.uk/pdf/sign14.pdf) (accessed 2008 Oct 20).
126. Scottish Intercollegiate Guidelines Network. *Management of patients with stroke III: Identification and management of dysphagia* (SIGN 78). Edinburgh (UK): The Network; 2004. Available: [www.sign.ac.uk/pdf/sign78.pdf](http://www.sign.ac.uk/pdf/sign78.pdf) (accessed 2008 Oct 20).
127. Scottish Intercollegiate Guidelines Network. *Management of patients with stroke IV: Rehabilitation, prevention and management of complications and discharge planning* (SIGN 64). Edinburgh (UK): The Network; 2005. Available: [www.sign.ac.uk/pdf/sign64.pdf](http://www.sign.ac.uk/pdf/sign64.pdf) (accessed 2008 Oct 20).
128. 27. Stroke Foundation of New Zealand. *Life after stroke: New Zealand guideline for management of stroke*. Wellington (NZ): The Foundation; 2003. Available: [www.nzgg.org.nz/guidelines/0037/ACF291F.pdf](http://www.nzgg.org.nz/guidelines/0037/ACF291F.pdf) (accessed 2008 Oct 20).
