# Supplementary material
Source: PubMed Central journal article supplement (PMC3193113)
Supplement: supp_101508_change-liu-2-at.pdf [file supp_101508_change-liu-2-at.pdf]

**Appendix 2:** Mark Tremblay's financial disclosures (as supplied by the authors)

**I have received consulting, speaking and/or research support from:**

- Canadian Institutes of Health Research
- Canadian Population Health Initiative
- Public Health Agency of Canada
- Statistics Canada
- Dairy Farmers of Canada
- Laval University
- University of British Columbia
- University of Victoria
- University of Alberta
- University of Calgary
- University of Saskatchewan
- University of Manitoba
- Lakehead University
- Laurentian University
- Nipissing University
- University of Toronto
- University of Western Ontario
- University of Moncton
- York University
- Queen's University
- University of Ottawa
- McGill University
- UPEI
- University of New Brunswick
- University of Guadalajara
- West Texas A&M University
- Dalhousie University
- University of Jyväskylä
- The Lawson Foundation
- Alberta Centre for Active Living
- Heart and Stroke Foundation of Ontario
- Ontario Ministry of Health Promotion
- Active Healthy Kids Canada
- ParticipACTION
- Fundacion Mexicana para la Salud
- Canadian Obesity Network
- New Brunswick School District #2
- City of London
- Manitoba Institute of Child Health
- Chronic Disease Prevention Alliance of Canada
- Canadian Federation of Biological Societies
- Heart and Stroke Foundation of Canada
- Heart and Stroke Foundation of Ontario
- Ophea
- Respironics, Inc.
- Physical and Health Education Canada
- Upper Canada District School Board
- Ottawa Catholic School Board
- Canadian Society for Exercise Physiology
- Australian Council for Health, PE and Rec
- Halton Health Region
- Peel Health Region
- Canadian Home Economics Foundation
- Recreation and Parks Association of Yukon
- Capital Health Authority
- Newfoundland and Labrador Parks & Rec
- Refreshments Canada
- NB Power
- New Brunswick Health and Wellness
- Alberta Health and Wellness
- Nova Scotia Recreation Commission
- PEI Health
- Canadian Fitness and Lifestyle Res Institute
- CAHPERD
- Health Canada
- Statistics Canada
- Macro International
- CHEO Research Institute
- Champlain LHIN
- Champlain Cardiovascular Disease Network
- Medical Research Fund of New Brunswick
- North American Society for Ped Exercise Med
- Interprovincial Sport and Recreation Council
- Pennington Biomedical Research Center
- Diabesters Inc.
- CAMBIO
- Nanjing University
- Shangdong University
- Beijing Sport University
- Ontario Society for Health and Fitness
- World Health Organization
- England Department of Health
- Wellcome Trust
- McMaster University
- Cancer Prevention Alliance of Canada
- C-CHANGE
- TROPIC
